# Supplementary material for: Ultrasound-Assisted Synthesis and In Silico Modeling of Methanesulfonyl-Piperazine-Based Dithiocarbamates as Potential Anticancer, Thrombolytic, and Hemolytic Structural Motifs
Source: MDPI journal article supplement (doi:10.3390/molecules27154776), 2022-07-26
Supplement: s1 [file s1]

Supplementary Materials

# Ultrasound-Assisted Synthesis and *In-Silico* Modeling of Methanesulfonyl-Piperazine-Based Dithiocarbamates as Potential Anticancer, Thrombolytic, and Hemolytic Structural Motifs

Freeha Hafeez <sup>1</sup>, Ameer Fawad Zahoor <sup>1,\*</sup>, Azhar Rasul <sup>2</sup>, Asim Mansha <sup>1</sup>, Razia Noreen <sup>3</sup>, Zohaib Raza <sup>4</sup>, Kulsoom Ghulam Ali <sup>1</sup>, Ali Irfan <sup>1</sup> and Gamal A. El-Hiti <sup>5,\*</sup>

<sup>1</sup> Department of Chemistry, Government College University Faisalabad, Faisalabad 38000, Pakistan; fariha5882@gmail.com (F.H.); mansha.asim@gmail.com (A.M.); kulsoom\_gcu@yahoo.com (K.G.A.); raialiirfan@gmail.com (A.I.)

<sup>2</sup> Department of Zoology, Government College University Faisalabad, Faisalabad 38000, Pakistan; drazharasul@gmail.com

<sup>3</sup> Department of Biochemistry, Government College University Faisalabad, Faisalabad 38000, Pakistan; razianoreen@hotmail.com

<sup>4</sup> Department of Pharmacology, Government College University Faisalabad, Faisalabad 38000, Pakistan; zuhaib.raza@live.com

<sup>5</sup> Cornea Research Chair, Department of Optometry, College of Applied Medical Sciences, King Saud University, Riyadh 11433, Saudi Arabia

\* Correspondence: fawad.zahoor@gcu.edu.pk (A.F.Z.); gelhiti@ksu.edu.sa (G.A.E.-H.); Tel.: +966-114693778 (G.A.E.-H.); Fax: +966-114693536 (G.A.E.-H.)

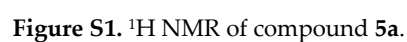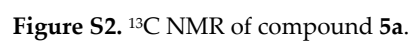

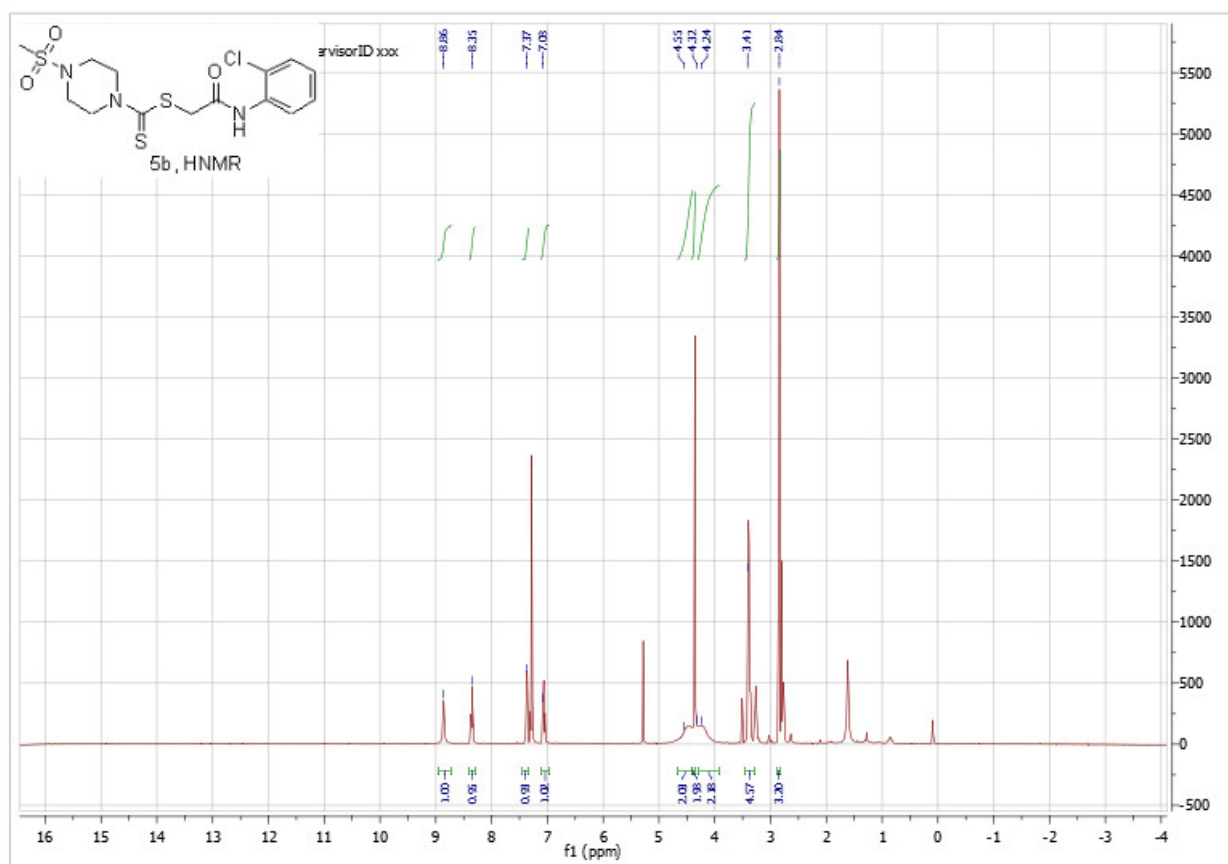Figure S3. <sup>1</sup>H NMR of compound 5b.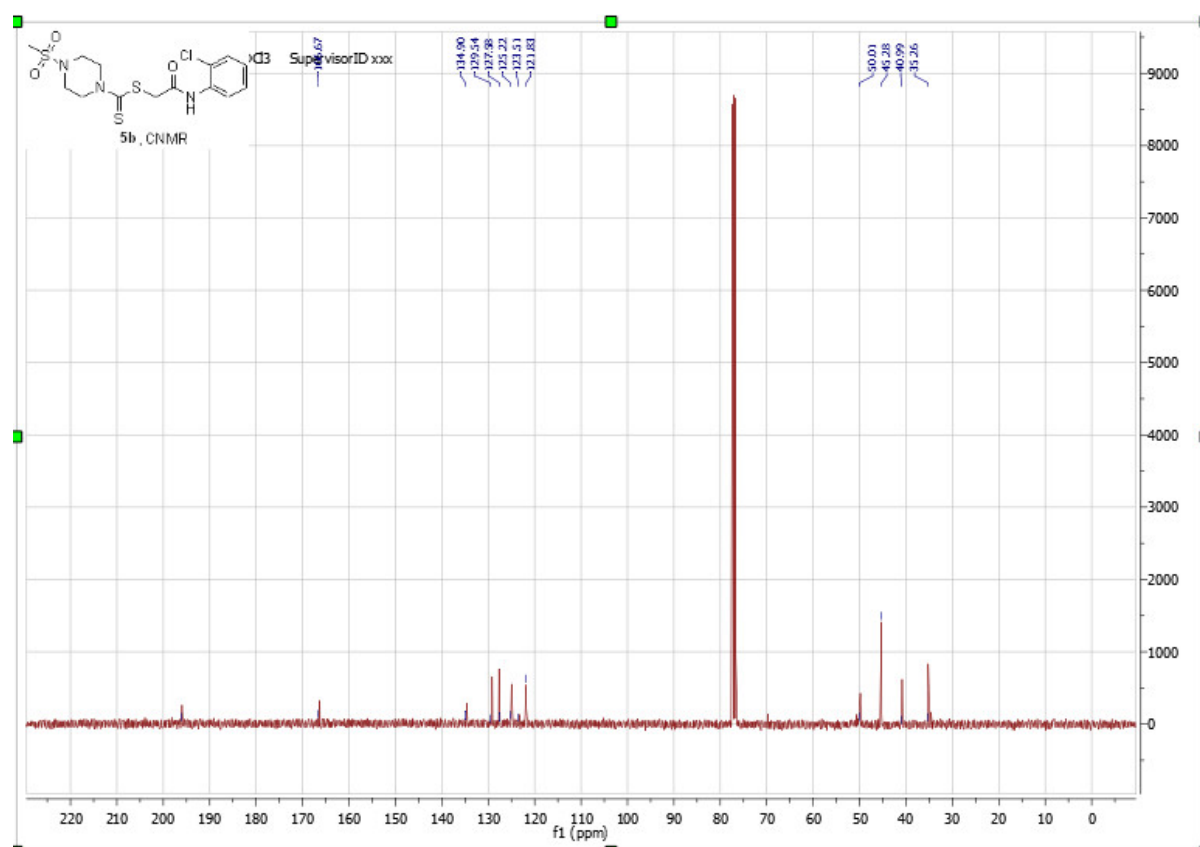Figure S4. <sup>13</sup>C NMR of compound 5b.

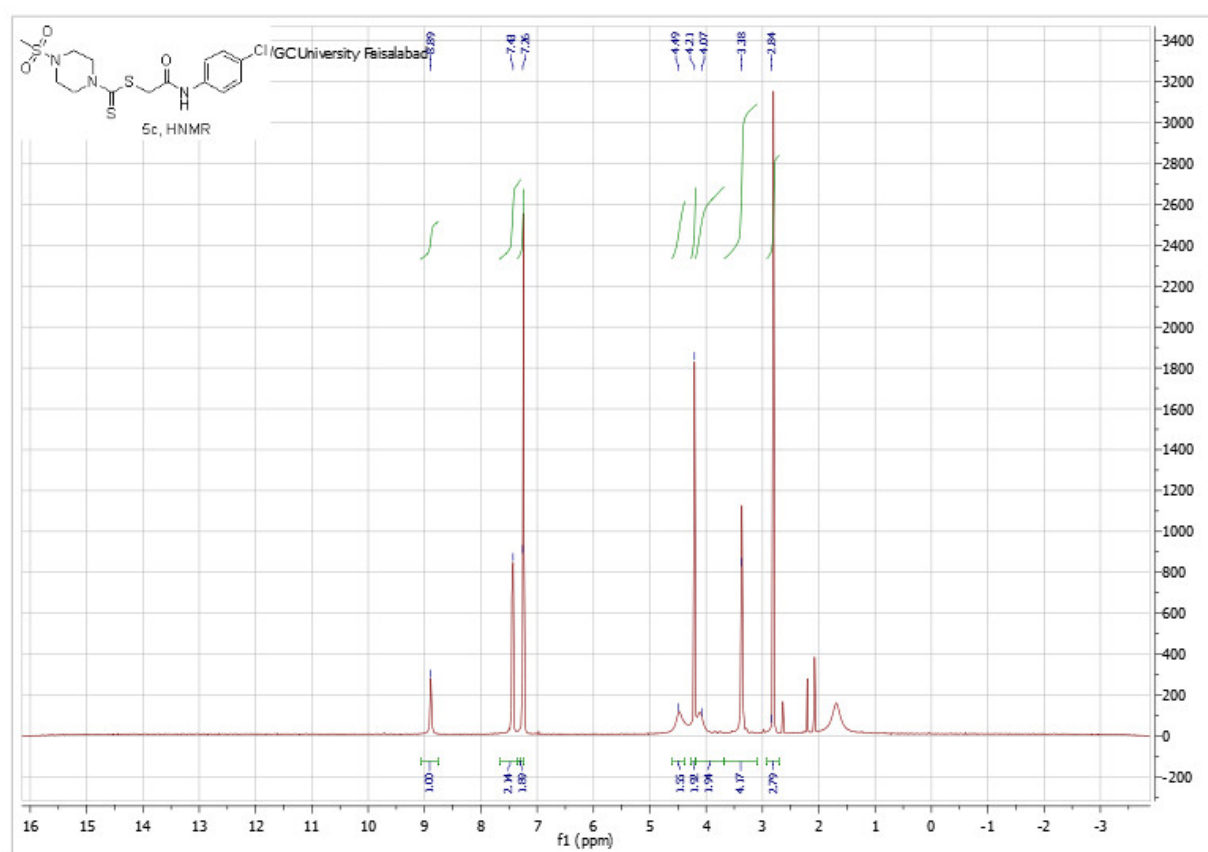Figure S5. <sup>1</sup>H NMR of compound 5c.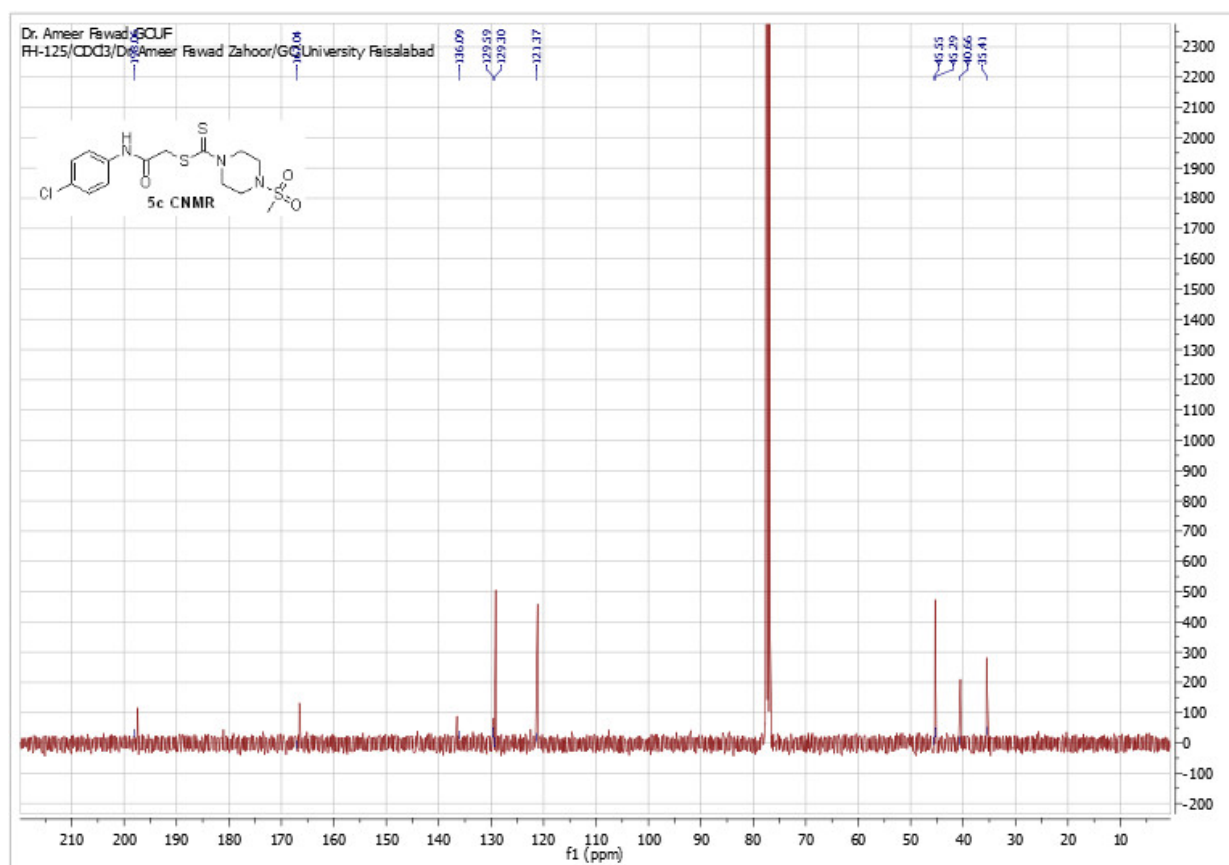Figure S6. <sup>13</sup>C NMR of compound 5c.

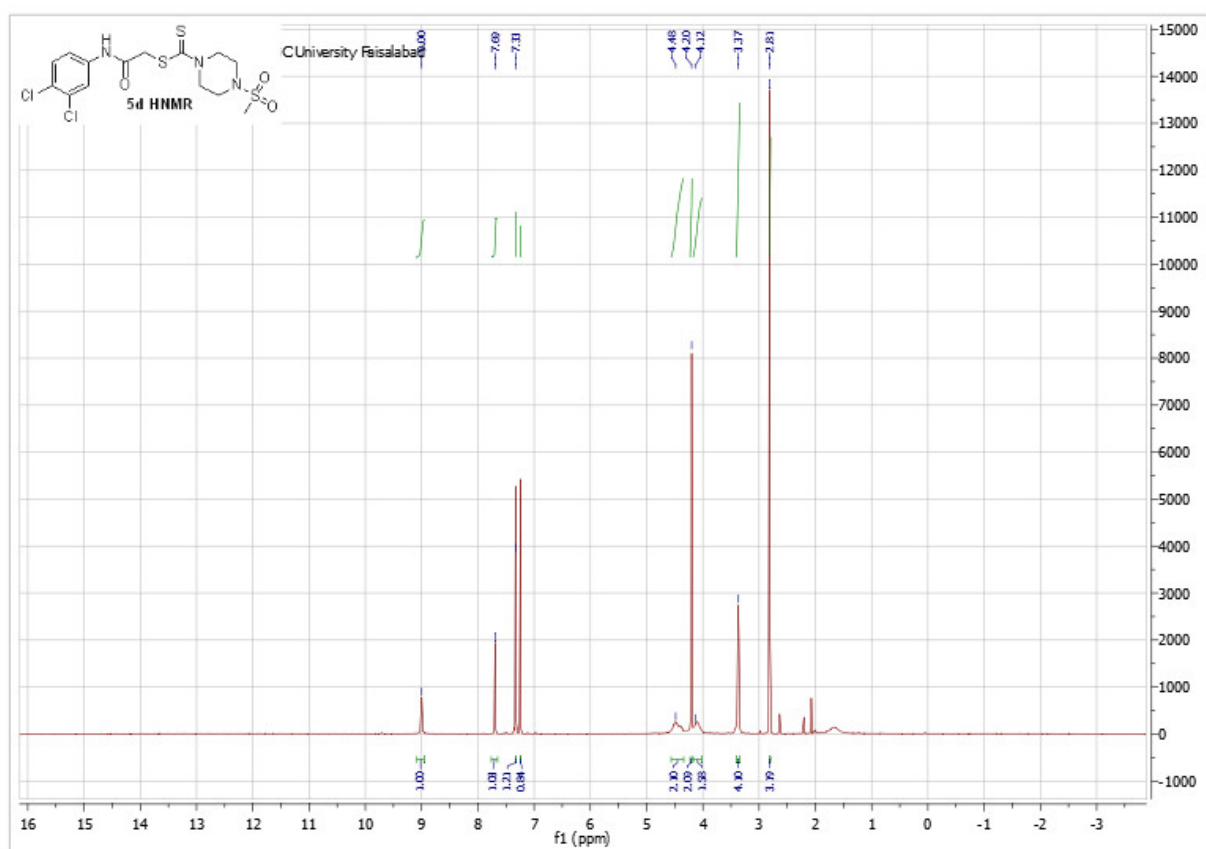Figure S7: <sup>1</sup>H NMR of compound 5d.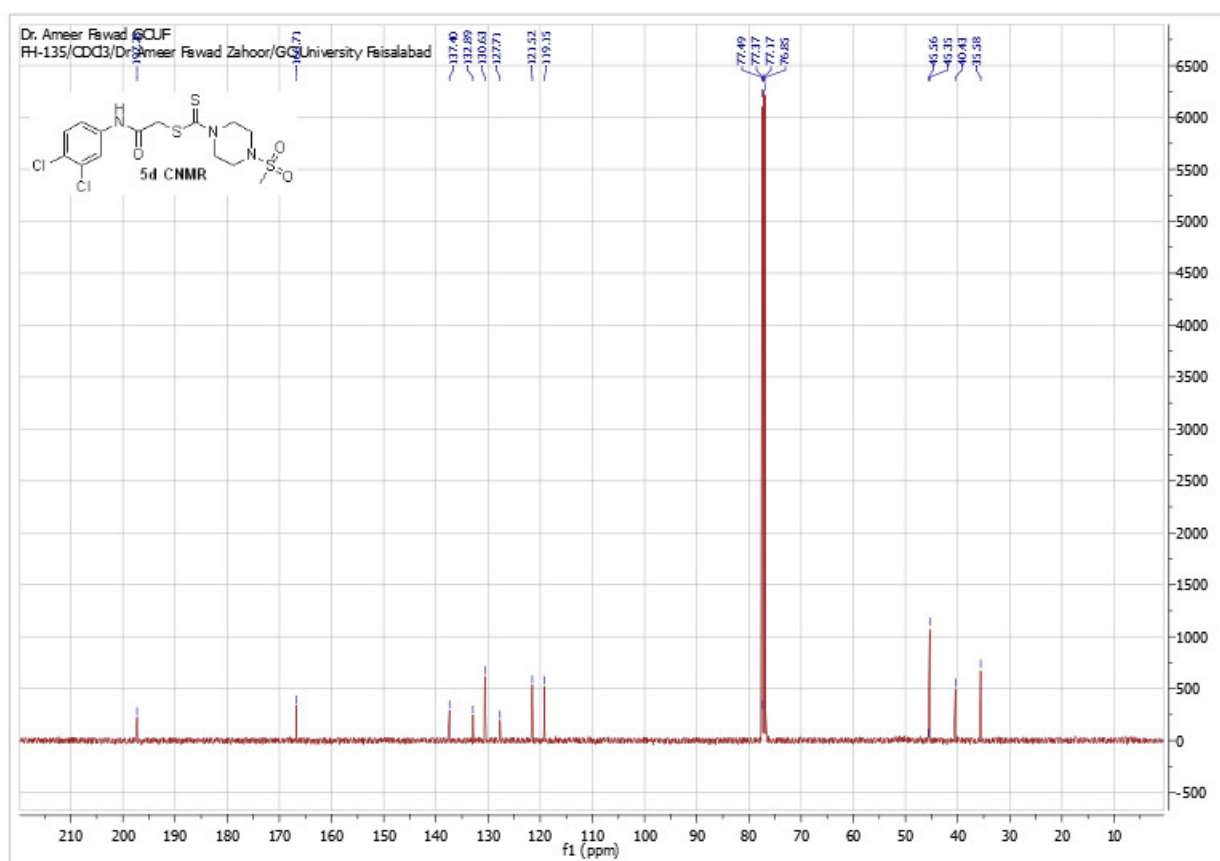Figure S8: <sup>13</sup>C NMR of compound 5d.

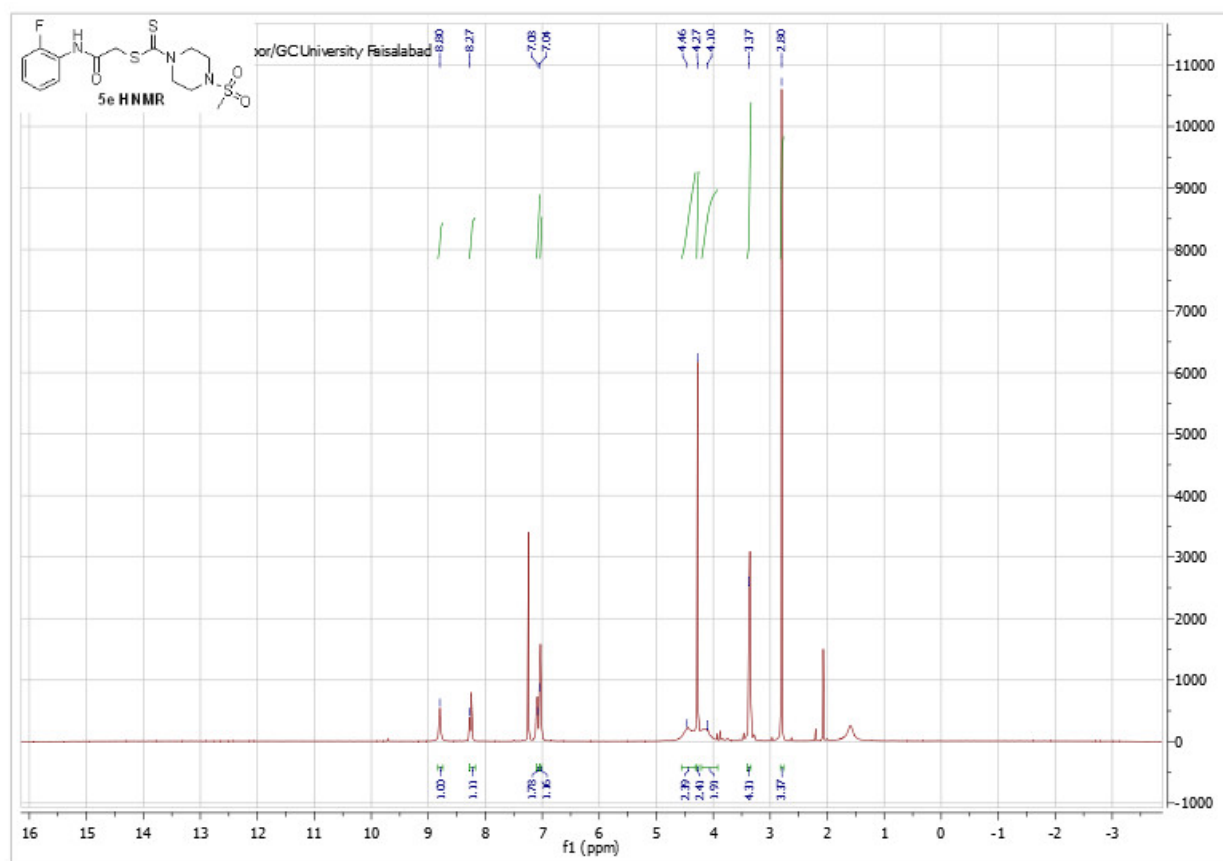Figure S9. <sup>1</sup>H NMR of compound 5e.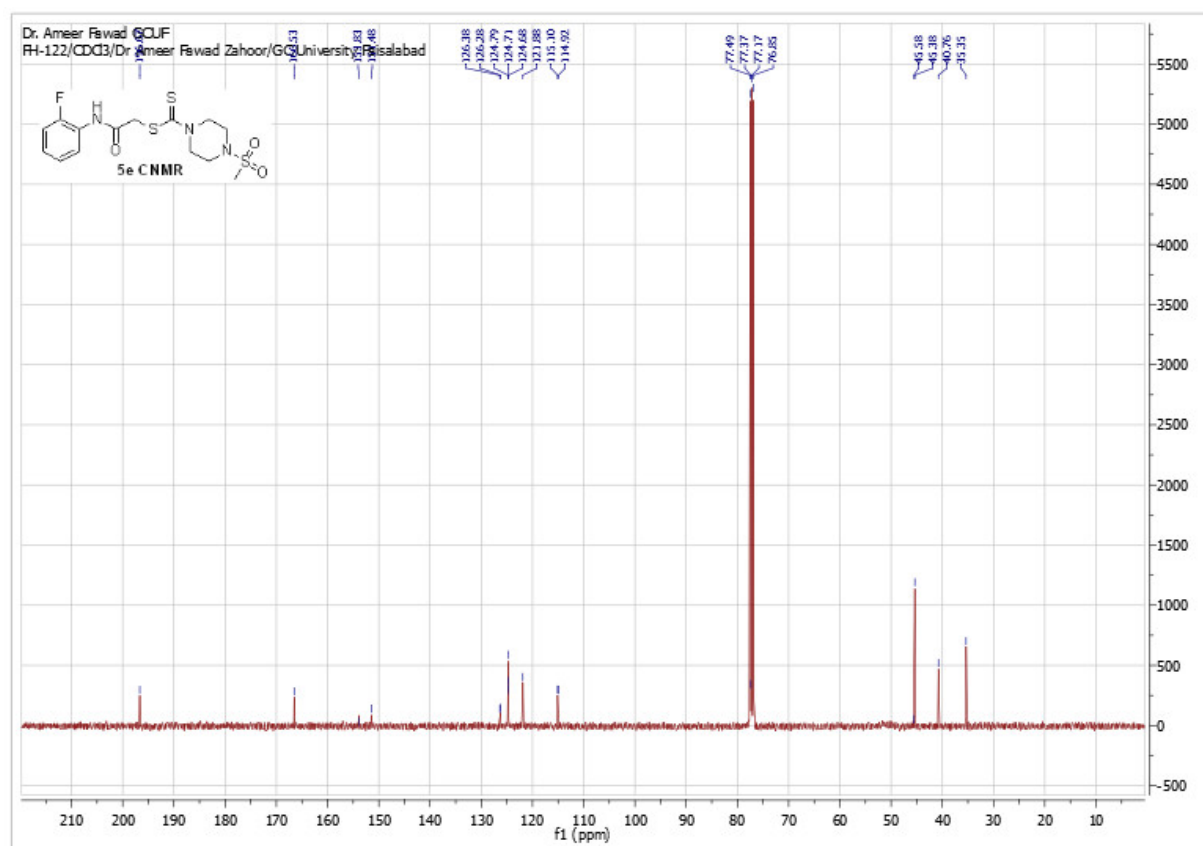Figure S10. <sup>13</sup>C NMR of compound 5e.

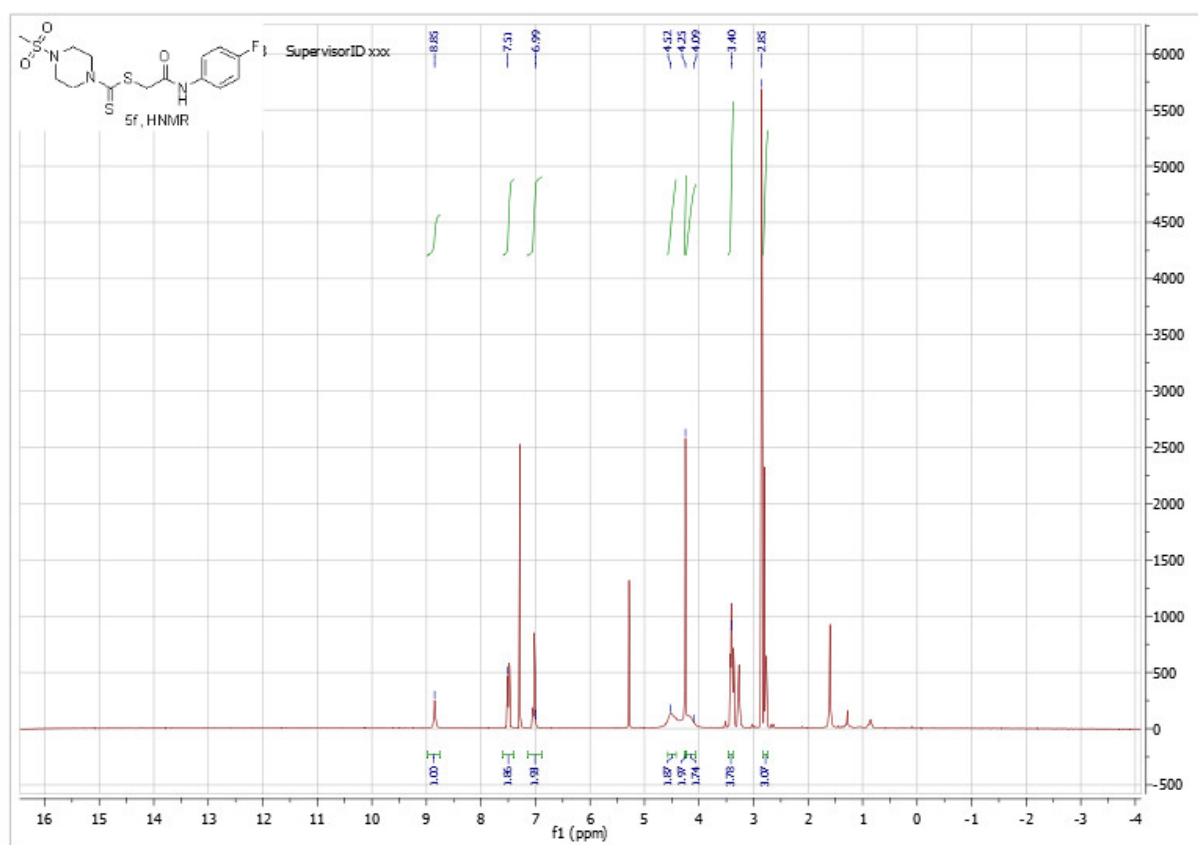Figure S11. <sup>1</sup>H NMR of compound 5f.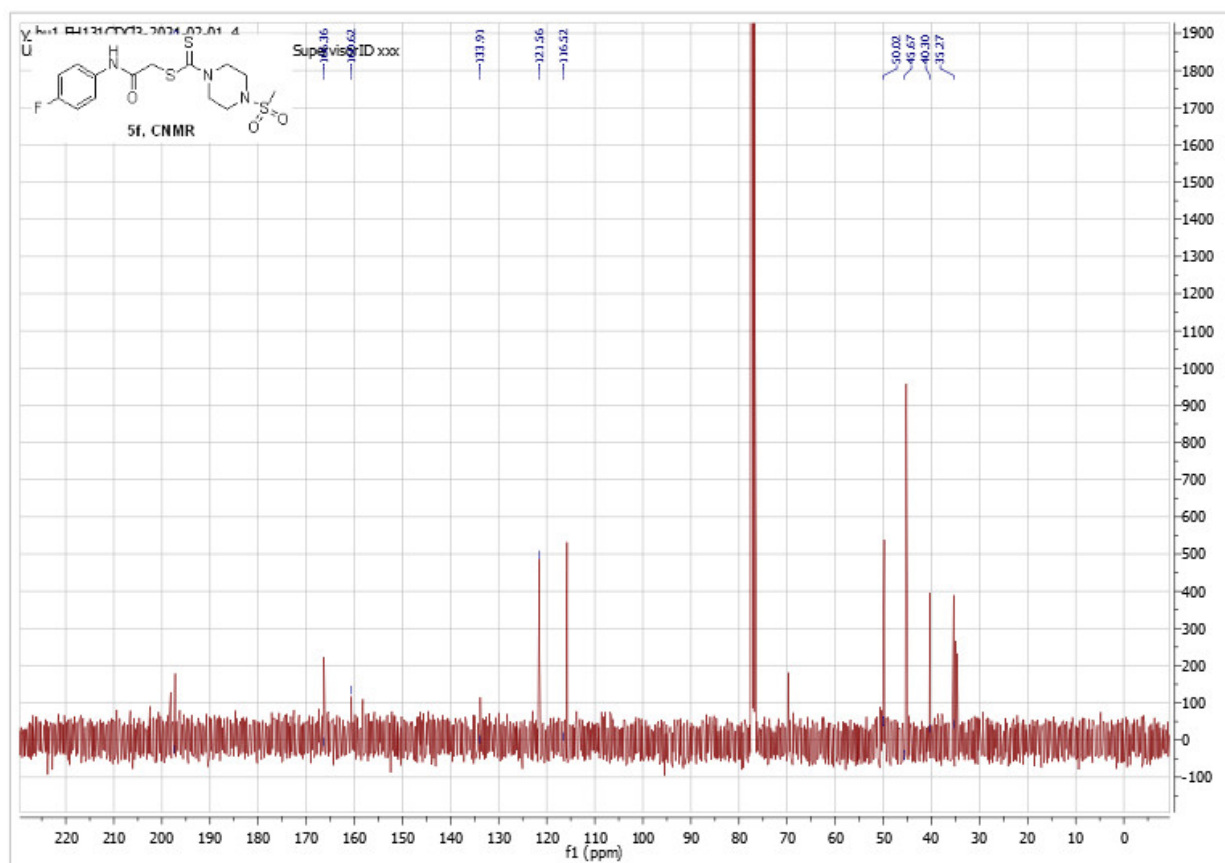Figure S12. <sup>13</sup>C NMR of compound 5f.



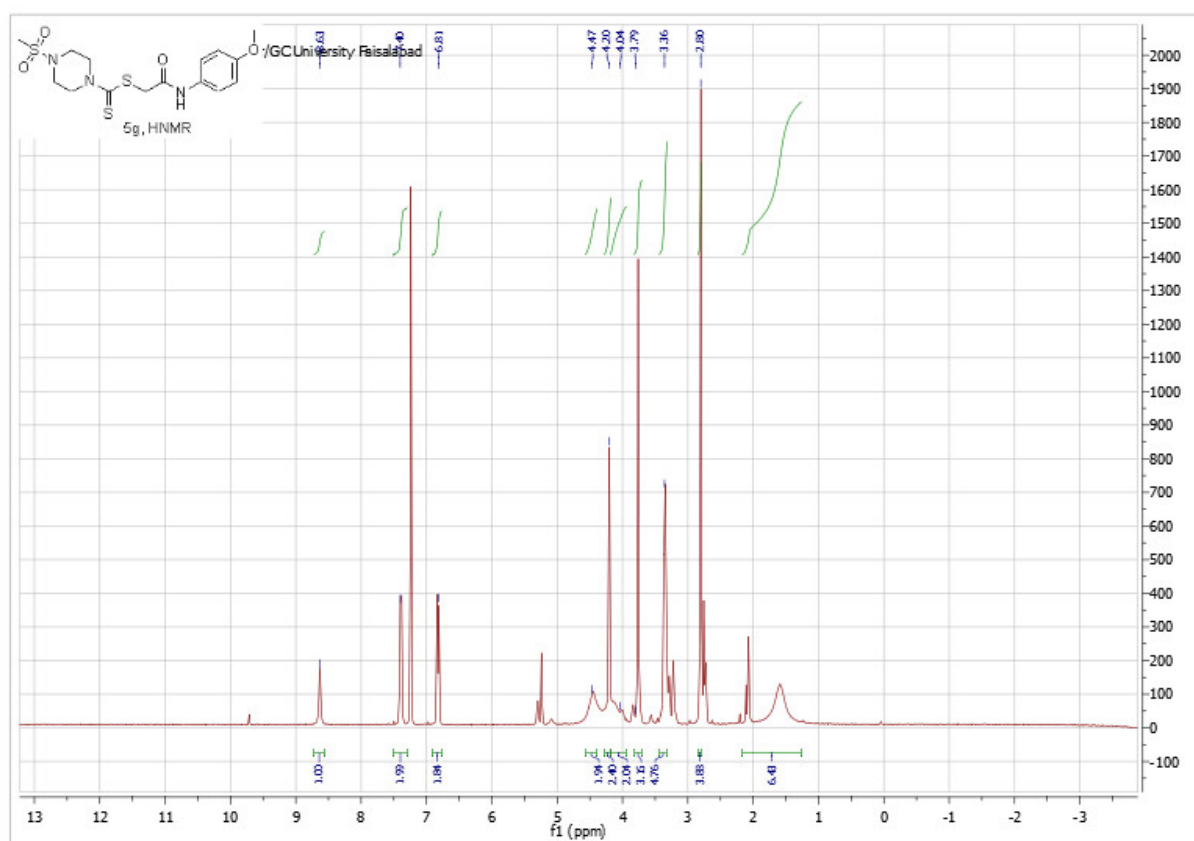Figure S13. <sup>1</sup>H NMR of compound 5g.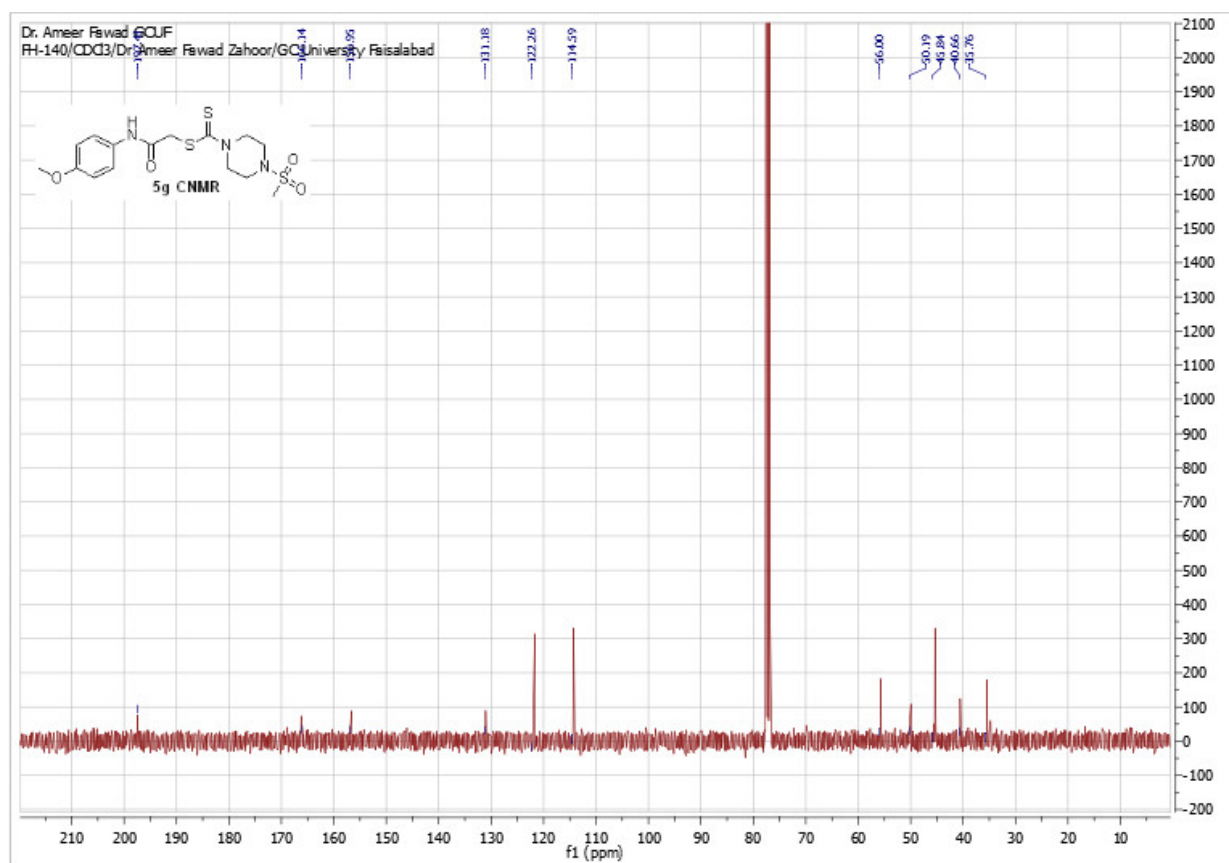Figure S14. <sup>13</sup>C NMR of compound 5g.



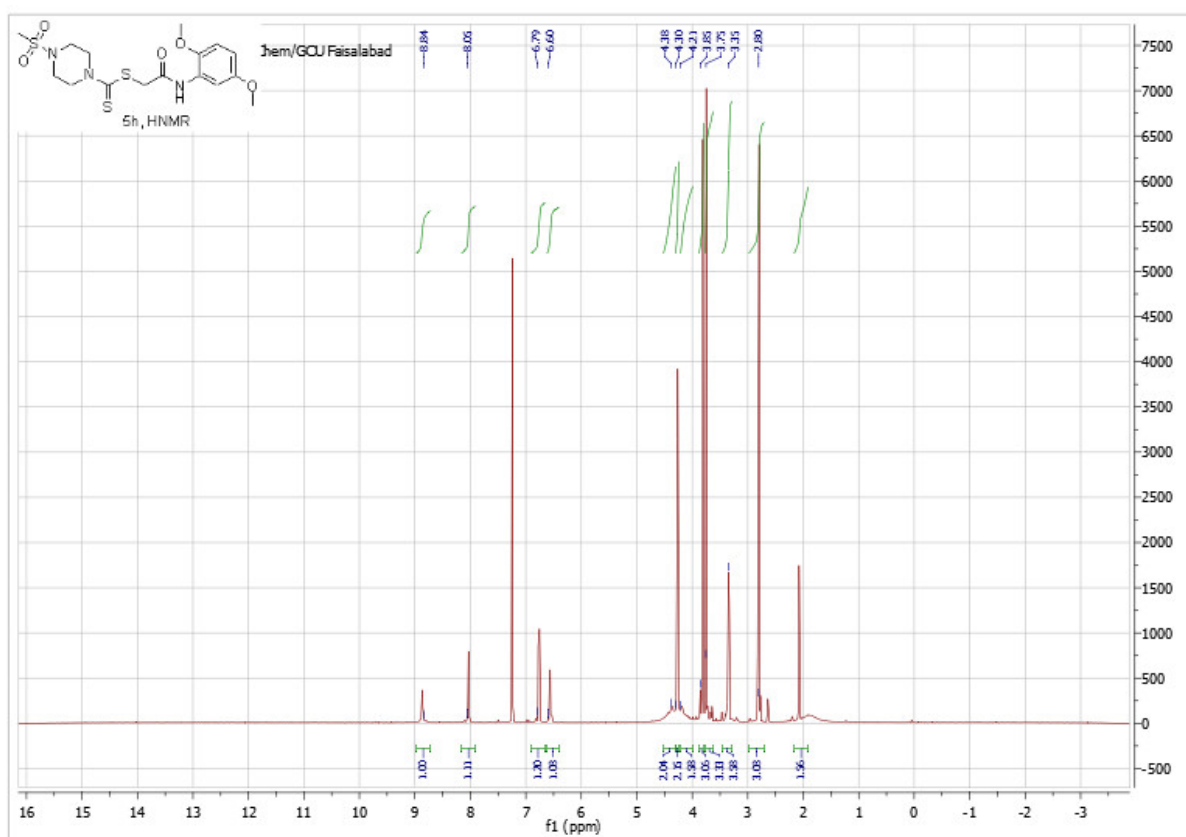Figure S15. <sup>1</sup>H NMR of compound 5h.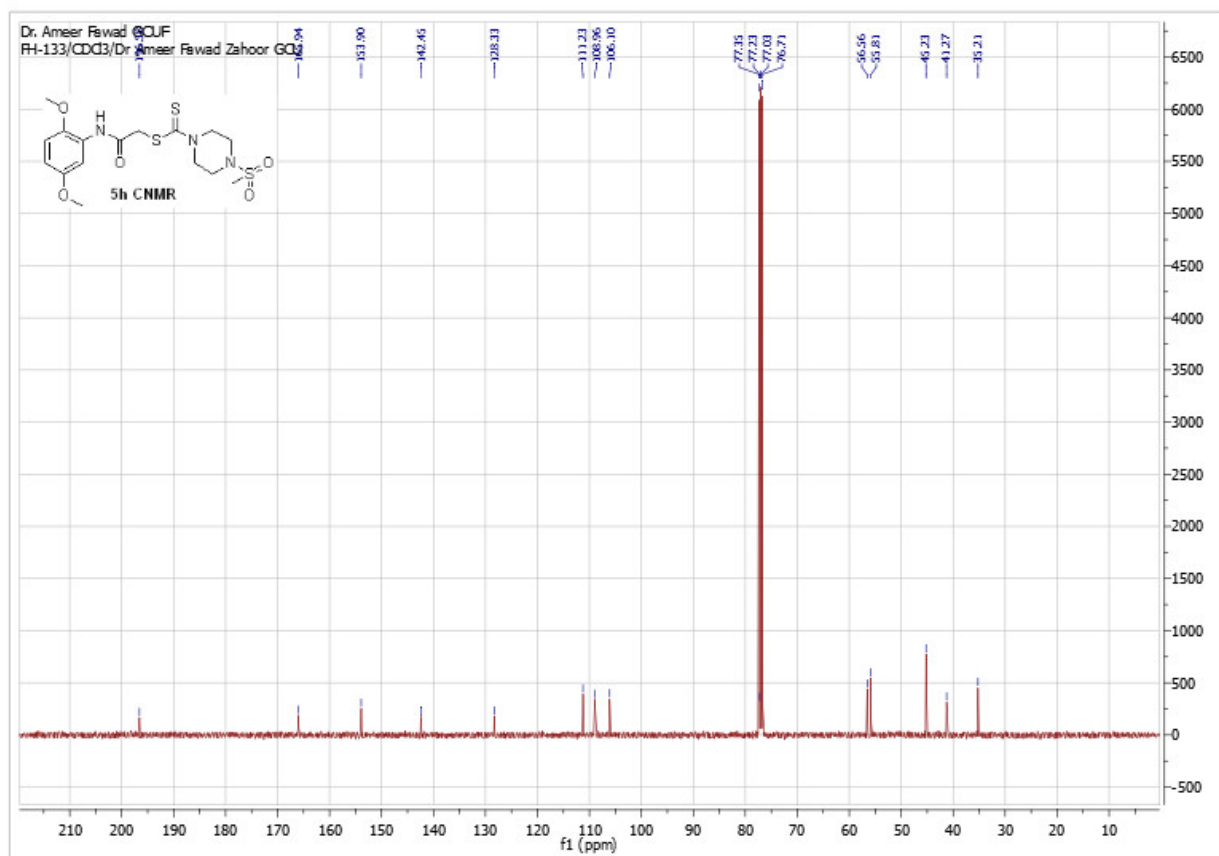Figure S16. <sup>13</sup>C NMR of compound 5h.

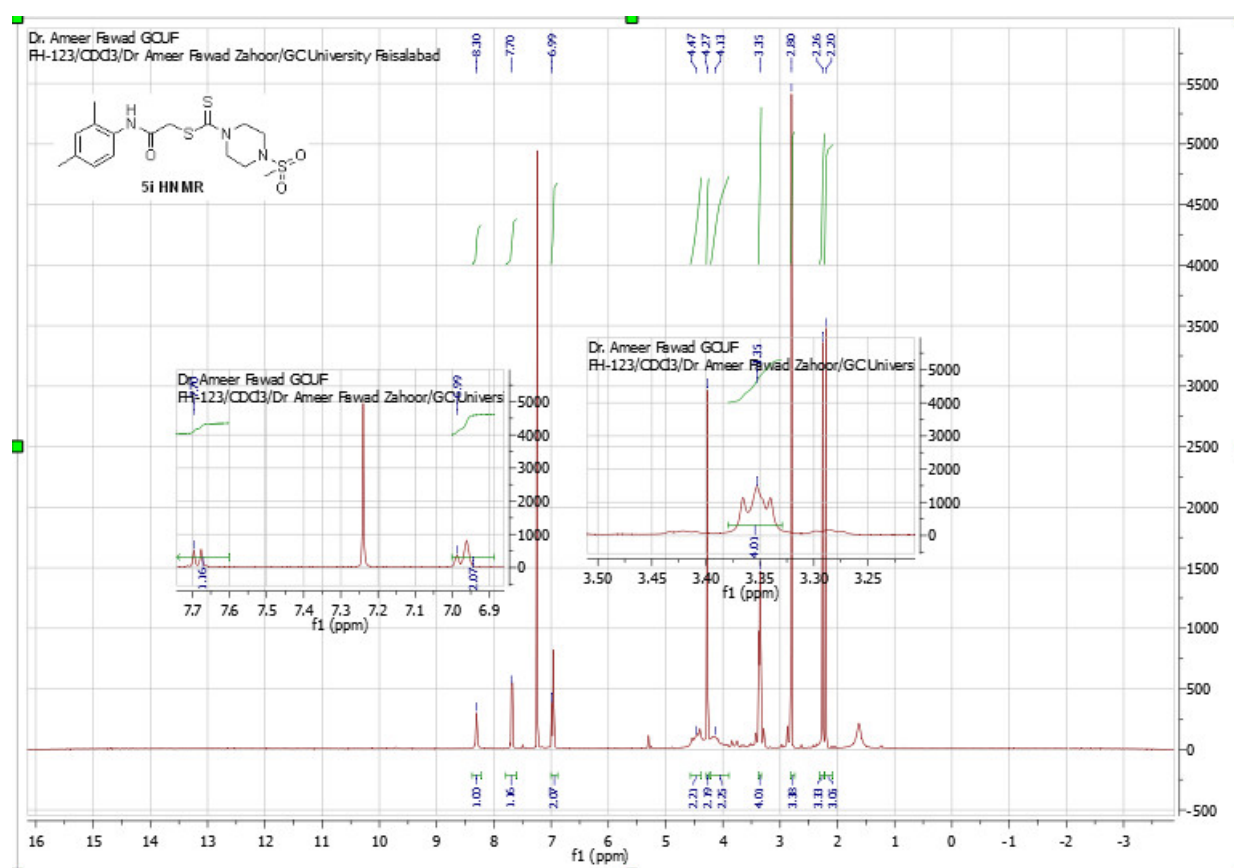Figure S17. <sup>1</sup>H NMR of compound 5i.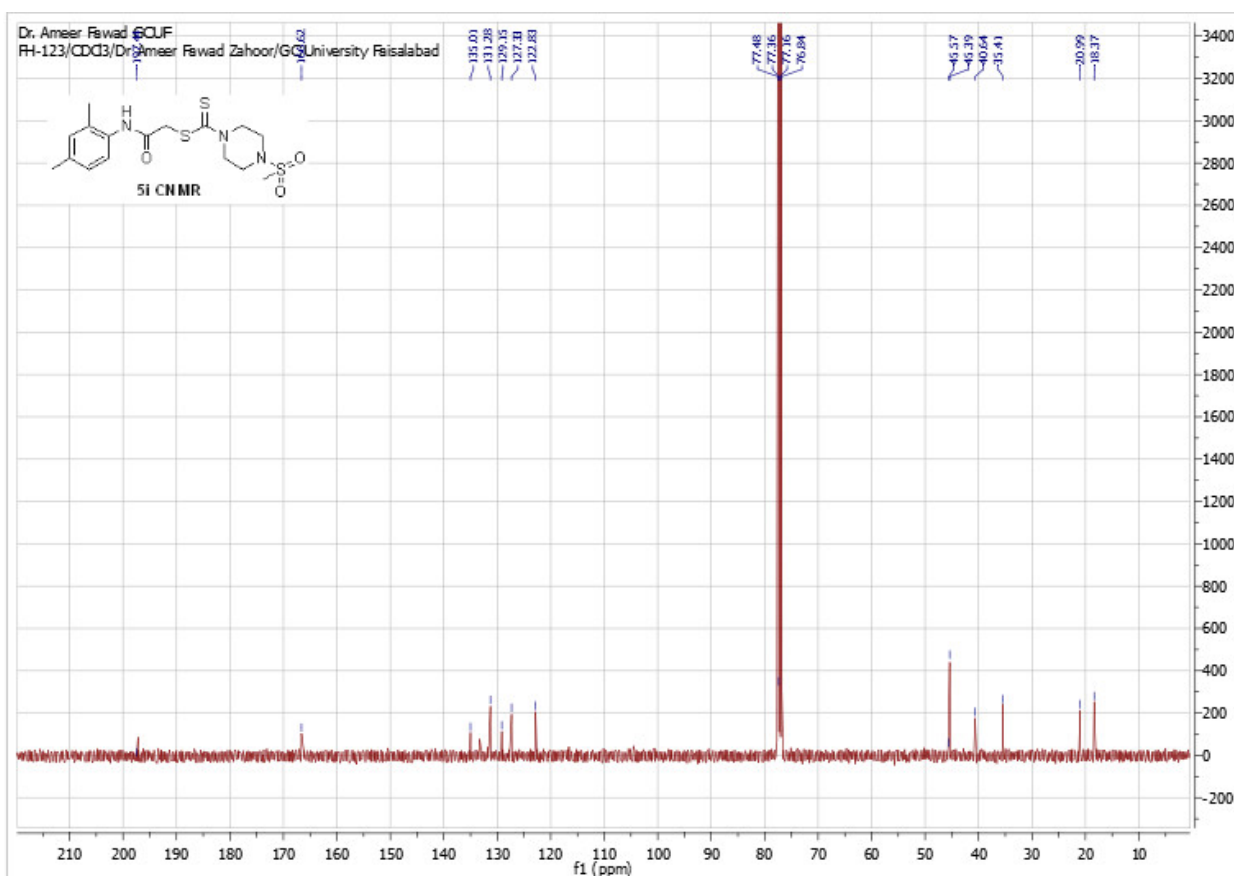Figure S18. <sup>13</sup>C NMR of compound 5i.

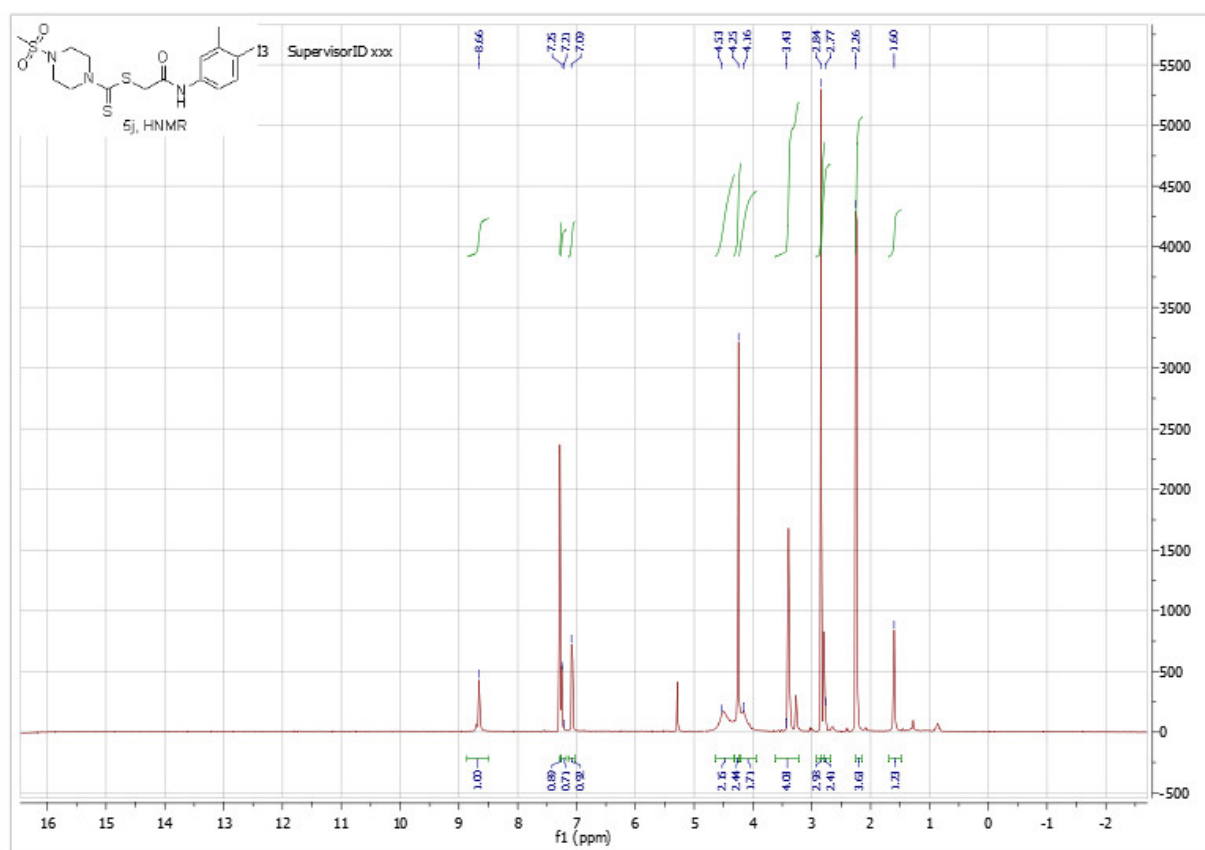Figure S19. <sup>1</sup>H NMR of compound 5j.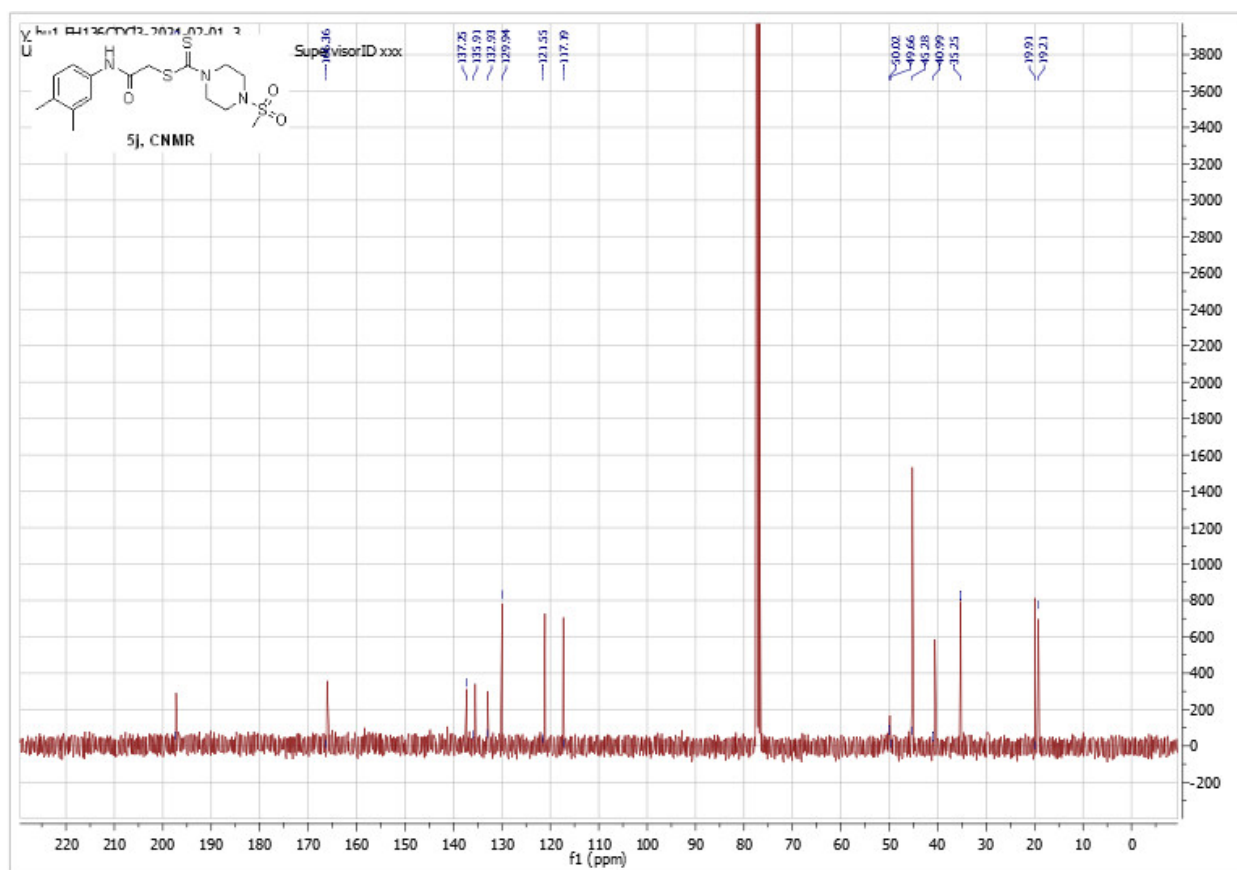Figure S20. <sup>13</sup>C NMR of compound 5j.
